# Supplementary material for: ECM-integrin signalling instructs cellular position sensing to pattern the early mouse embryo
Source: Oxford University Press journal article supplement (doi:10.1242/dev.200140), 2021-12-15
Supplement: dev200140supp.pdf [file dev200140supp.pdf]

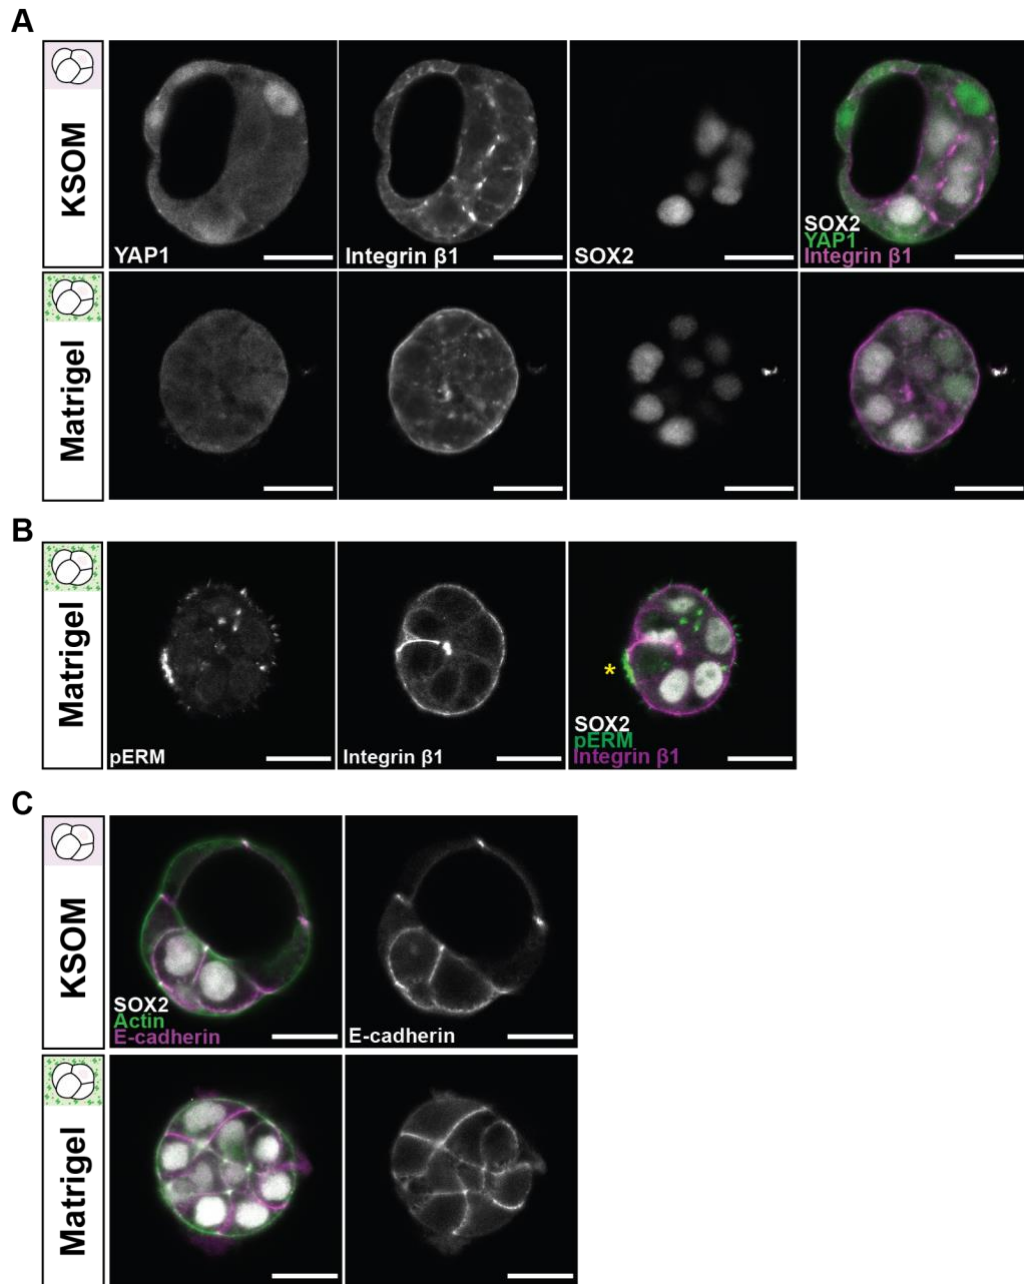

**Fig. S1. Exogenous ECM drives Hippo signalling and suppresses apical polarity. Related to Figure 2.** (A) Representative images of TE-ICM fate specification and integrin  $\beta 1$  distribution among cells following immunosurgery and culture in KSOM or Matrigel. SOX2 marks ICM fate while nuclear YAP1 is characteristic of TE cells. (B) Partial enrichment of pERM on the surface of isolated cells cultured in Matrigel. The cell with the patch of pERM signal (\*) is SOX2-negative. (C) Representative images of E-cadherin localisation in isolated cells following culture in KSOM or Matrigel. Scale bars = 20  $\mu$ m.

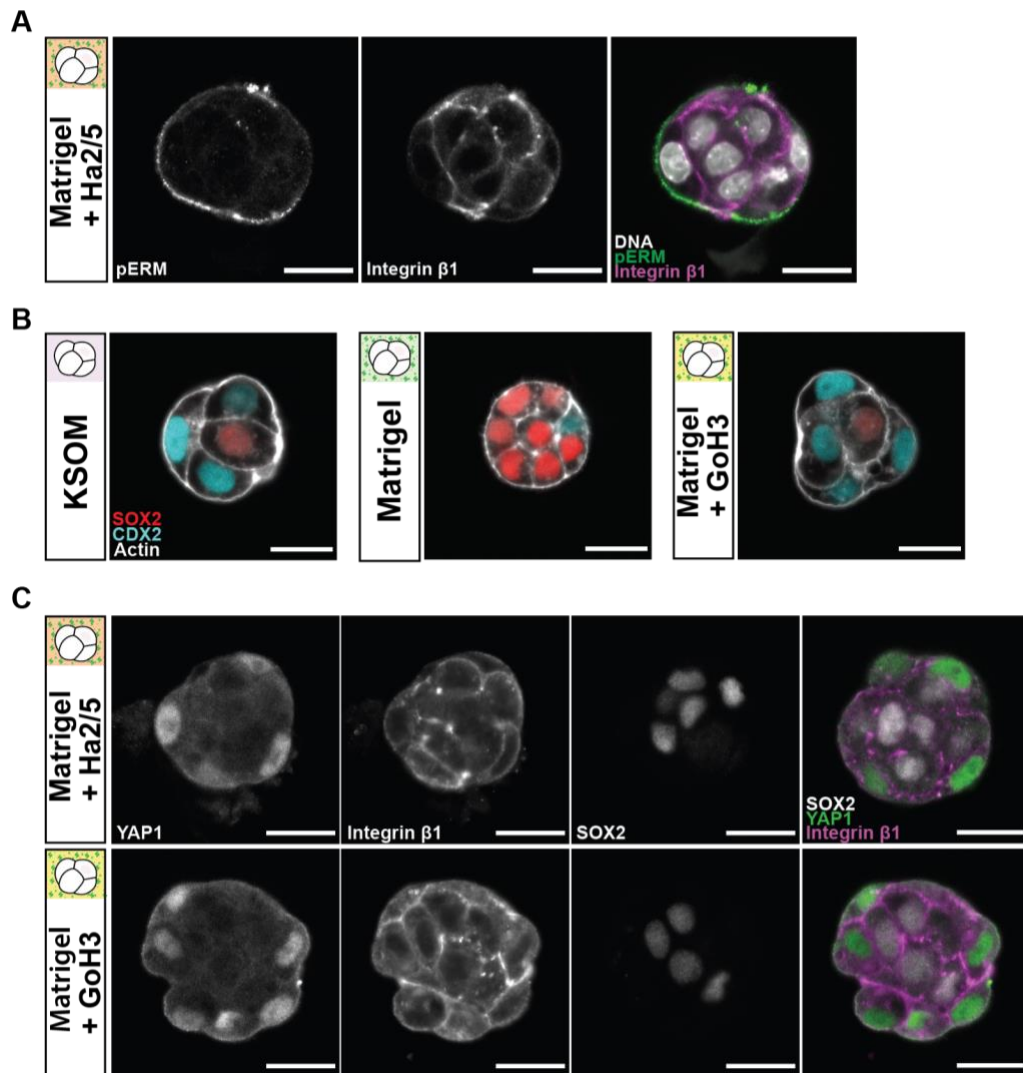

**Fig. S2. Integrin  $\alpha 6 \beta 1$  inhibition restores inside-outside patterning to Matrigel-cultured cells. Related to Figure 3.** (A) Representative images of apicobasal polarity in cells cultured in Matrigel with integrin  $\beta 1$  function-blocking antibody Ha2/5 (10  $\mu\text{g/ml}$ ). Phosphorylated ERM (pERM) proteins mark apical domain. (B) Representative images of TE-ICM fate specification following culture in KSOM, Matrigel, or Matrigel with integrin  $\alpha 6$  function-blocking antibody GoH3 (10  $\mu\text{g/ml}$ ). (C) Representative images of inside-outside patterning following culture in Matrigel with either Ha2/5 or GoH3. In addition to SOX2 expression, differential localisation of YAP1 distinguishes TE and ICM fate, as YAP1 is nuclear localised in TE cells. Scale bars = 20  $\mu\text{m}$ .

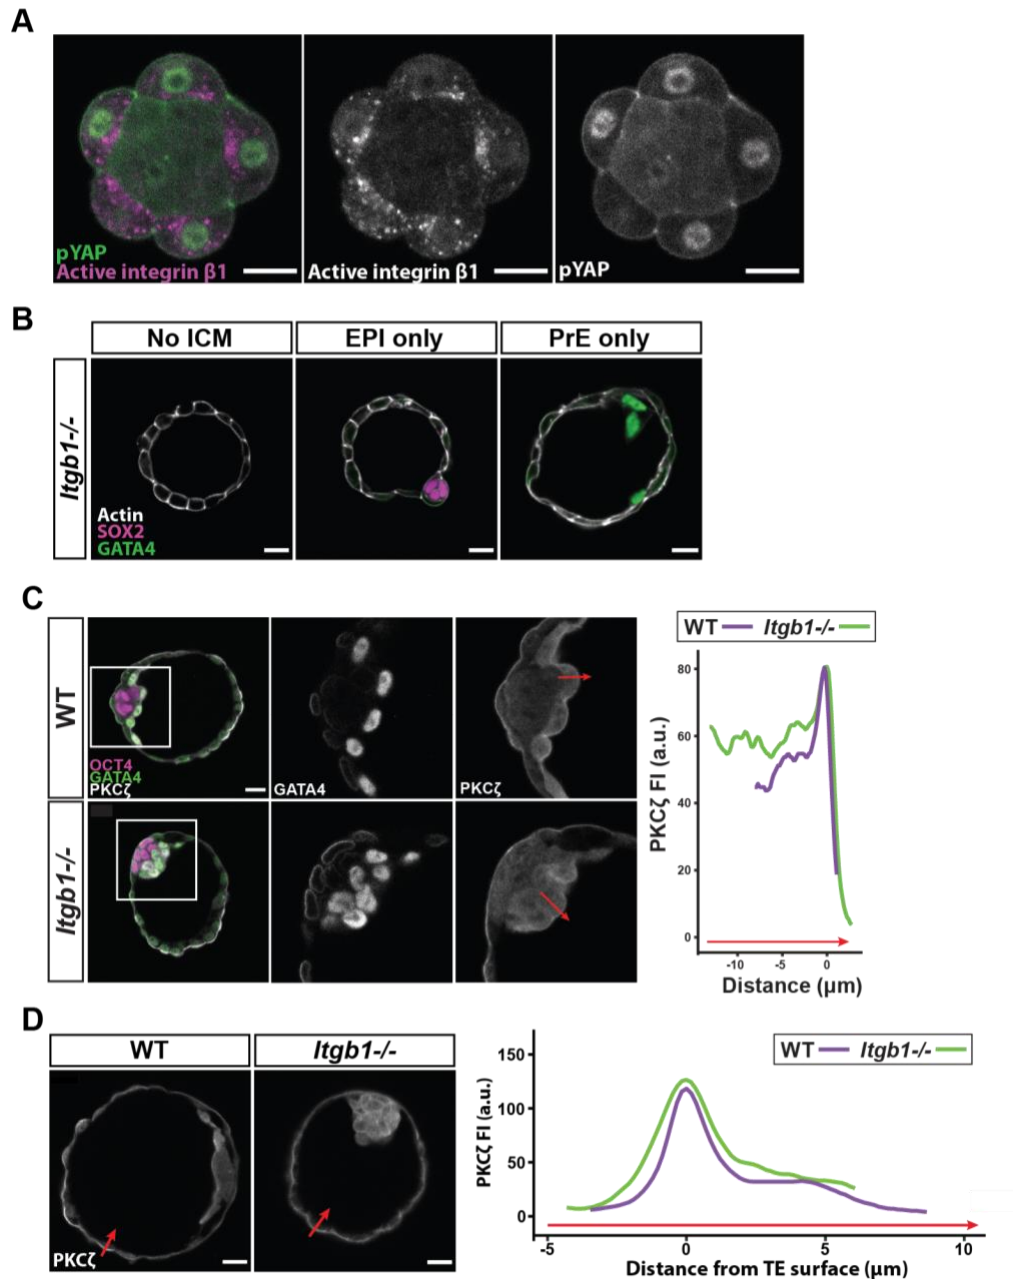

**Fig. S3. EPI-PrE patterning in the late blastocyst *in vivo* requires integrin  $\beta 1$ . Related to Figure 4.**

(A) Representative images show localisation of the active conformation of integrin  $\beta 1$  (12G10 antibody) in the morula stage embryo. Phosphorylated YAP (pYAP) signal distinguishes inside and outside cells, as inside cells exhibit cytoplasmic pYAP localisation.

(B) Images of *Itgb1*<sup>-/-</sup> blastocysts with severe disruption of ICM.

(C) Representative images show PKC $\zeta$  distribution across the PrE in WT and *Itgb1*<sup>-/-</sup> blastocysts at E4.0, followed by plot profile of fluorescence intensity along line of interest across the PrE layer (red arrow).

(D) Representative images of PKC $\zeta$  distribution in WT and *Itgb1*<sup>-/-</sup> blastocysts at E4.0, followed by profile plot of fluorescence intensity along line of interest (red arrow) across the TE. Plot profiles are aligned based on the point of maximum PKC $\zeta$  intensity at the apical surface of TE surface (distance "0").

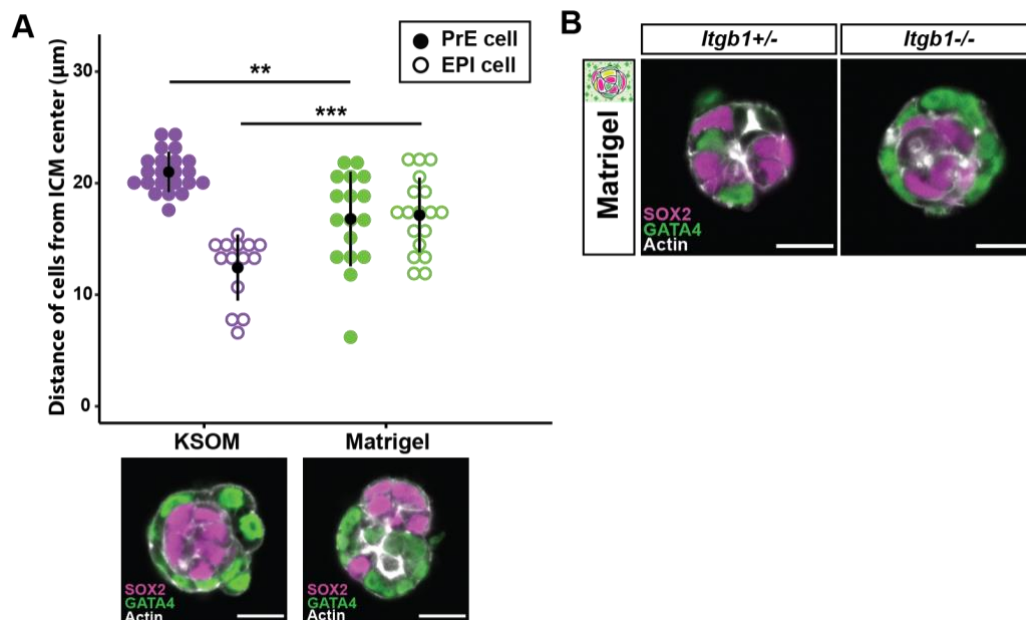

**Fig. S4. Matrigel disrupts spatial arrangement of EPI/PrE cells in isolated ICMs. Related to Figure 5.**

(A) Distance of PrE and EPI cells from the center of the ICM cultured in either KSOM or Matrigel. Distance data are from representative samples displayed beneath the plot (same as images from Figure 5D and 5F).

(B) Representative images of ICMs isolated from E3.5 *Itgb1* transgenic embryos and cultured in either Matrigel. ICMs from *Itgb1*<sup>+/-</sup> embryos serve as littermate controls. SOX2 marks EPI cells, and GATA4 marks PrE cells. Scale bars = 20  $\mu\text{m}$ .

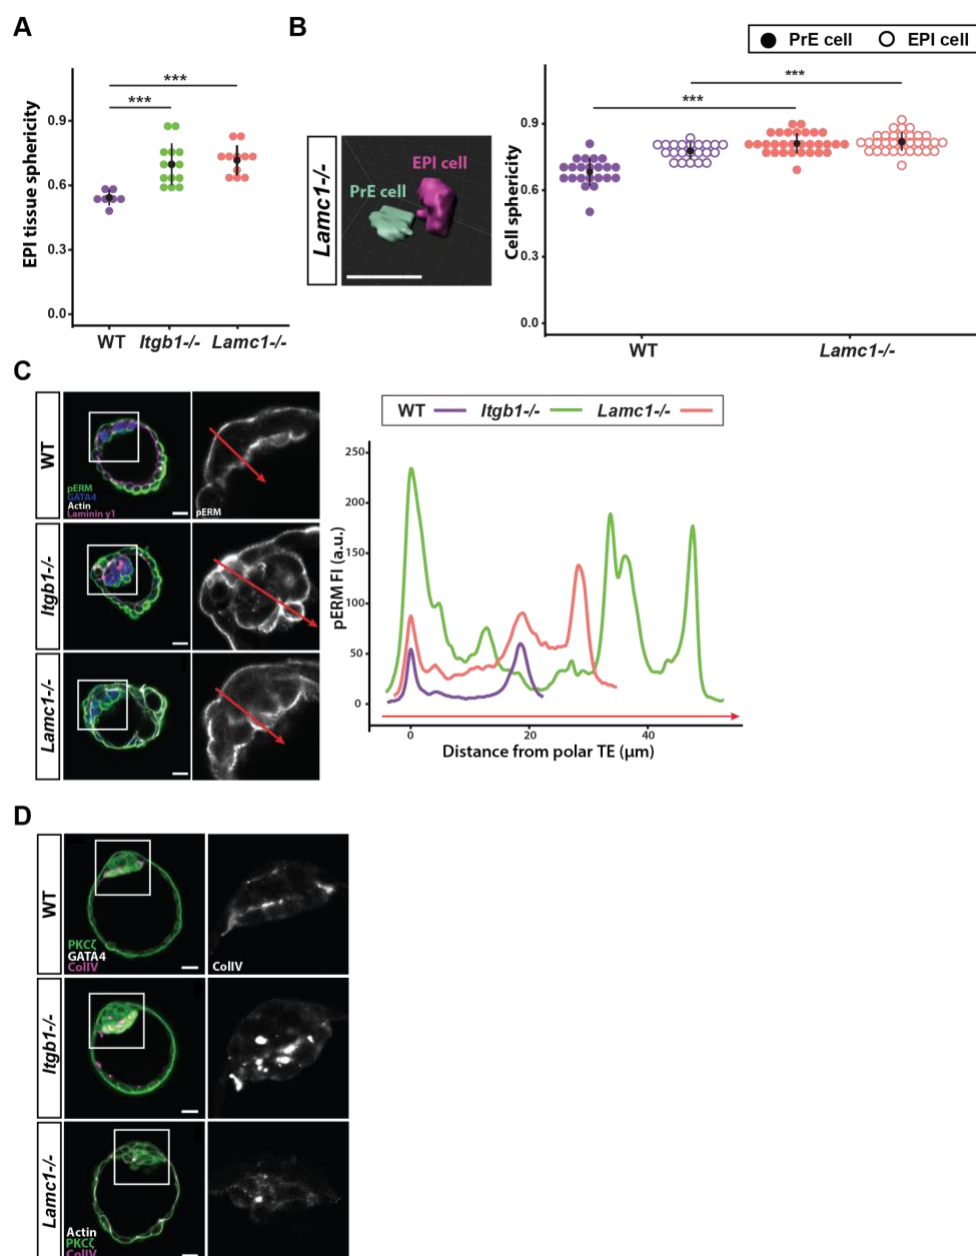

**Fig. S5. *Lamc1*<sup>-/-</sup> embryos share phenotype with *Itgb1*<sup>-/-</sup> embryos at E4.0. Related to Figure 6.**

(A) Sphericity of segmented EPI tissues from WT, *Itgb1*<sup>-/-</sup>, and *Lamc1*<sup>-/-</sup> blastocysts at E4.0. Error bars show mean  $\pm$  s.d. Student's *t*-test, two-sided. N = 32 embryos. \*\*\*  $p < 0.001$ .

(B) Representative image of individual *Lamc1*<sup>-/-</sup> PrE and EPI cells segmented on Imaris. Dot plot displays sphericity measured from individual segmented surfaces. Error bars show mean  $\pm$  s.d. Student's *t*-test, two-sided. N = 106 cells from 17 embryos. \*\*\*  $p < 0.001$ .

(C) Representative image of morphology and apical polarity of the ICM in WT, *Itgb1*<sup>-/-</sup>, and *Lamc1*<sup>-/-</sup> blastocysts at E4.0. Accompanying intensity profile shows distribution of pERM across the ICM along the red line of interest. Data for WT and *Itgb1*<sup>-/-</sup> are duplicated from Figure 4G for ease of comparison with *Lamc1*<sup>-/-</sup> mutants.

(D) Representative images show distribution of basal collagen IV in WT, *Itgb1*<sup>-/-</sup> and *Lamc1*<sup>-/-</sup> embryos at E4.0. Scale bars = 20  $\mu$ m.

#### Table S1. Primary data for statistical figures.

[Click here to download Table S1](#)

**Table S2. Primary antibodies**

| Epitope                            | Host   | Catalogue #   | Company                   | Dilution |
|------------------------------------|--------|---------------|---------------------------|----------|
| aPKC (PKC $\zeta$ )                | Rabbit | sc-216        | Santa Cruz Biotechnology  | 1:200    |
| CDX2                               | Mouse  | MU392A-UC     | Biogenex                  | 1:200    |
| E-cadherin                         | Rat    | U3254         | Sigma Aldrich             | 1:100    |
| GATA4                              | Goat   | AF2606        | R&D Systems               | 1:200    |
| GATA6                              | Goat   | AF1700        | R&D Systems               | 1:200    |
| Integrin $\alpha 6$ (GoH3)         | Rat    | 555734        | BD Pharmingen             | 1:100    |
| Integrin $\beta 1$                 | Rat    | MAB1997       | Millipore                 | 1:100    |
| Integrin $\beta 1$ (Ha2/5)         | Rat    | 555002        | BD Pharmingen             | 1:100    |
| Integrin $\beta 1$ (active, 9EG7)  | Rat    | 553715        | BD Pharmingen             | 1:100    |
| Integrin $\beta 1$ (active, 12G10) | Mouse  | sc-59827      | Santa Cruz Biotechnology  | 1:100    |
| Laminin (non-chain specific)       | Rabbit | NB300-14422   | Novus Biologicals         | 1:100    |
| Laminin $\alpha 5$                 | Rat    | n/a           | Gift from Lydia Sorokin   | N/A      |
| Laminin $\beta 1$                  | Rat    | n/a           | Gift from Lydia Sorokin   | N/A      |
| Laminin $\gamma 1$                 | Rat    | n/a           | Gift from Lydia Sorokin   | N/A      |
| NANOG                              | Rabbit | RCAB002P-F    | ReproCELL, Inc            | 1:200    |
| YAP1                               | Mouse  | H00010413-M01 | Abnova                    | 1:100    |
| Phospho-ERM                        | Rabbit | 3726          | Cell Signaling Technology | 1:200    |
| Sox-2 (D9B8N)                      | Rabbit | 23064         | Cell Signaling Technology | 1:200    |

**Table S3. Secondary antibodies and dyes**

| Fluorophore          | Target     | Host   | Catalogue # | Company           | Dilution |
|----------------------|------------|--------|-------------|-------------------|----------|
| Alexa Fluor 488      | Goat IgG   | Donkey | A11055      | Life Technologies | 1:200    |
| Alexa Fluor 488 Plus | Rabbit IgG | Donkey | A32790      | ThermoFisher      | 1:200    |
| Alexa Fluor 546      | Rabbit IgG | Donkey | A10040      | ThermoFisher      |          |
| Cy5                  | Mouse IgG  | Donkey | 715-175-150 | Jackson           | 1:200    |
|                      |            |        |             | ImmunoResearch    |          |
| Cy5                  | Rat IgG    | Donkey | 712-175-153 | Jackson           | 1:200    |
|                      |            |        |             | ImmunoResearch    |          |
| DAPI                 | (DNA)      | -      | D3571       | Life Technologies | 1:1000   |
| Rhodamine phalloidin | (Actin)    | -      | R415        | Invitrogen        | 1:200    |

**Table S4. Sequence of genotyping primers**

| Mouse line/locus                                   | Primer 1                      | Primer 2                      | Primer 3                       |
|----------------------------------------------------|-------------------------------|-------------------------------|--------------------------------|
| <i>Itgb1</i> deleted                               | TGAATATGGGCTTG<br>GCAGTTA     | CCACAACCTTTCCCAG<br>TTAGCTCTC |                                |
| <i>Itgb1</i> tm1Efu (floxed)                       | CGGCTCAAAGCAG<br>AGTGTCAGTC   | CCACAACCTTTCCCAG<br>TTAGCTCTC |                                |
| <i>Lamc1</i> deleted/ <i>Lamc1</i> tmStr1 (floxed) | AAA GAA GCA GAG<br>TGT GGG GG | TGG CCT TTT CAA<br>CCC TGG AA | GCC TTC TAT CGC<br>CTT CTT GAC |
| ZP3 Cre                                            | TGCTGTTTCACTGG<br>TTGTGCGGCG  | TGCCTTCTCTACACC<br>TGCGGTGCT  |                                |
